# Supplementary material
Source: publisher site journal article supplement (https://www.dovepress.com/article/335133)
Supplement: Supplementary file 1 [file get_supplementary_file.php]

## SUPPLEMENTARY ONLINE CONTENT

**Supplementary Figure S1.** Directed acyclic graph with level of income as exposure and major adverse clinical events as outcome

**Supplementary Figure S2.** Number of events, event rates, and hazard ratios (95% confidence intervals) between income and secondary clinical endpoints among **men** in study population I and II.

**Supplementary Figure S3.** Number of events, event rates, and hazard ratios (95% confidence intervals) between income and secondary clinical endpoints among **women** in study population I and II.

**Supplementary Figure S4.** Cumulative incidence on the association between **income** and secondary clinical outcomes adjusted for age and ethnicity.

**Supplementary Figure S5.** Cumulative incidence on the association between **education** and secondary clinical outcomes adjusted for age and ethnicity.

**Supplementary Figure S6.** Number of events, event rates, and hazard ratios (95% confidence intervals) on the association between income and non-persistence to **statins** as well as the mediating effect on the association between income and risk of MACE among **men**, adjusted for age and ethnicity.

**Supplementary Figure S7.** Number of events, event rates, and hazard ratios (95% confidence intervals) on the association between income and non-persistence to **antiplatelets** as well as the mediating effect on the association between income and risk of MACE among **men**, adjusted for age and ethnicity.

**Supplementary Table S1.** ATC-, ICD-10-, and procedure codes

**Supplementary Table S2.** Baseline characteristics of study population II (**education** as exposure) stratified by sex.

**Supplementary Table S3.** Events, event rates (95% CI), and hazard ratios (95% CI) for the association between **income** and risk of non-persistence to medication and clinical events using none or 30-days window of initiation of medication

**Supplementary Table S4.** Events, event rates (95% CI), and hazard ratios (95% CI) for the association between **education** and risk of non-persistence to medication and clinical events using none or 30-days window of initiation of medication

**Supplementary Figure S1.** Directed acyclic graph with major adverse cardiovascular events (MACE) as outcome

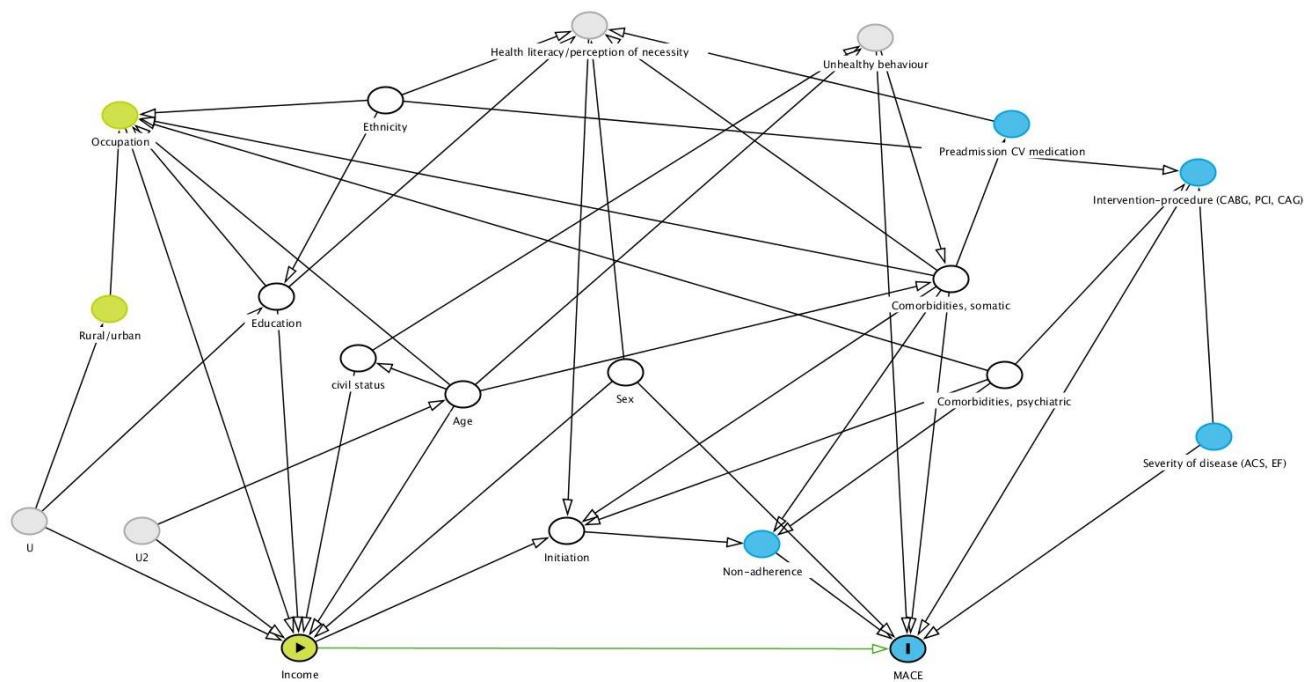

Minimal adjustment after adjusting for initiation: education, civil status, ethnicity, age, comorbidities somatic, comorbidities psychiatric, sex

**Supplementary Figure S2.** Number of events, event rates, and hazard ratios (95% confidence intervals) between income and secondary clinical endpoints among **men** in study population I and II.

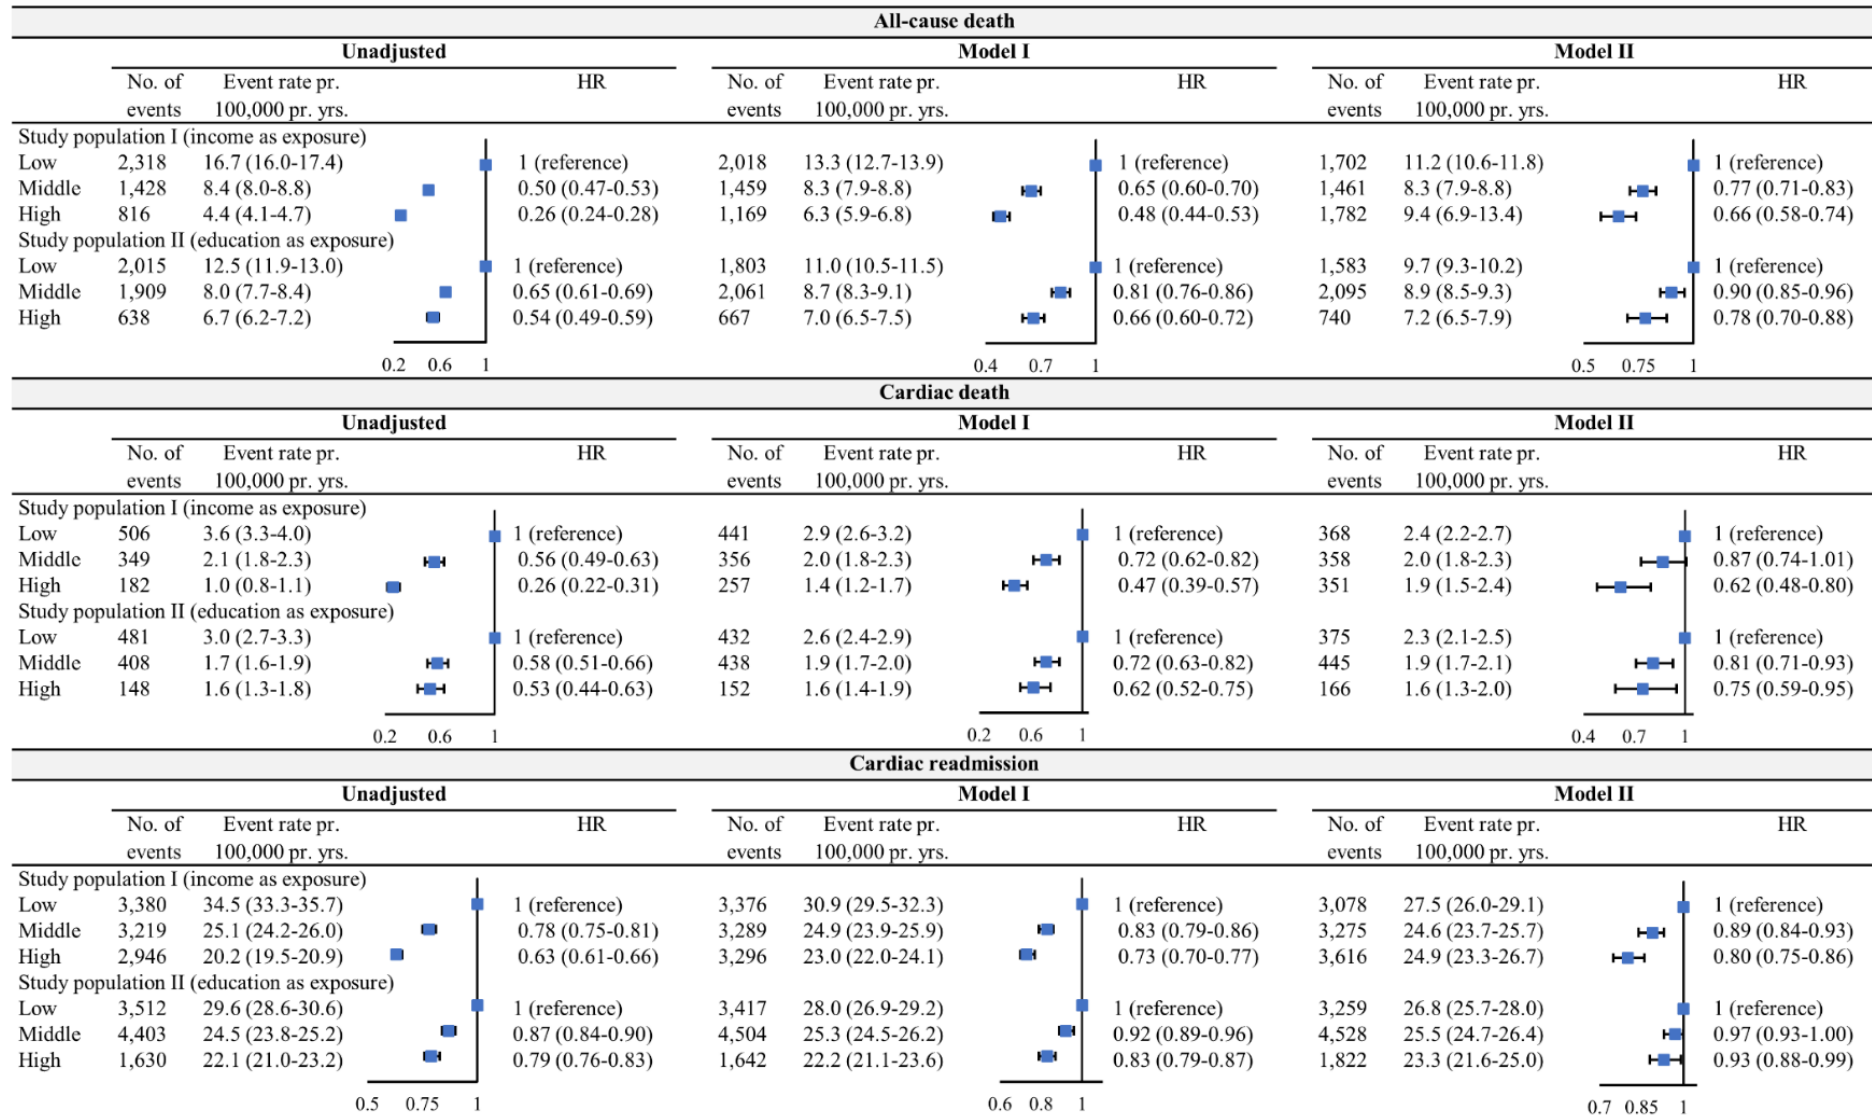

**Supplementary Figure S3.** Number of events, event rates, and hazard ratios (95% confidence intervals) between income and secondary clinical endpoints among **women** in study population I and II.

| All-cause death                                  |                                 |                  |               |                                 |                  |               |                                 |                  |  |
|--------------------------------------------------|---------------------------------|------------------|---------------|---------------------------------|------------------|---------------|---------------------------------|------------------|--|
| Unadjusted                                       |                                 |                  | Model I       |                                 |                  | Model II      |                                 |                  |  |
| No. of events                                    | Event rate pr. 100,000 pr. yrs. | HR               | No. of events | Event rate pr. 100,000 pr. yrs. | HR               | No. of events | Event rate pr. 100,000 pr. yrs. | HR               |  |
| Study population I (income as exposure)          |                                 |                  |               |                                 |                  |               |                                 |                  |  |
| Low                                              | 2,039                           | 21.1 (20.2-22.0) | 1,860         | 17.4 (16.6-18.3)                | 1 (reference)    | 1,692         | 15.6 (14.7-16.5)                | 1 (reference)    |  |
| Middle                                           | 784                             | 10.5 (9.8-11.2)  | 913           | 12.2 (11.4-13.0)                | 0.50 (0.46-0.54) | 937           | 12.6 (11.8-13.6)                | 0.82 (0.74-0.90) |  |
| High                                             | 270                             | 4.9 (4.3-5.5)    | 486           | 8.8 (7.7-10.2)                  | 0.23 (0.20-0.26) | 771           | 12.8 (9.8-17.2)                 | 0.64 (0.52-0.79) |  |
| Study population II (education as exposure)      |                                 |                  |               |                                 |                  |               |                                 |                  |  |
| Low                                              | 2,077                           | 18.9 (18.1-19.7) | 1,826         | 16.1 (15.4-16.8)                | 1 (reference)    | 1,686         | 15.0 (14.3-15.7)                | 1 (reference)    |  |
| Middle                                           | 758                             | 9.5 (8.9-10.2)   | 883           | 11.3 (10.5-12.1)                | 0.51 (0.47-0.55) | 928           | 11.8 (11.0-12.7)                | 0.76 (0.70-0.83) |  |
| High                                             | 258                             | 6.9 (6.1-7.8)    | 337           | 9.3 (8.2-10.5)                  | 0.37 (0.32-0.42) | 382           | 10.2 (8.7-12.0)                 | 0.71 (0.61-0.84) |  |
| Cardiac death                                    |                                 |                  |               |                                 |                  |               |                                 |                  |  |
| Unadjusted                                       |                                 |                  | Model I       |                                 |                  | Model II      |                                 |                  |  |
| No. of events                                    | Event rate pr. 100,000 pr. yrs. | HR               | No. of events | Event rate pr. 100,000 pr. yrs. | HR               | No. of events | Event rate pr. 100,000 pr. yrs. | HR               |  |
| Study population I (income as exposure)          |                                 |                  |               |                                 |                  |               |                                 |                  |  |
| Low                                              | 411                             | 4.3 (3.9-4.7)    | 375           | 3.5 (3.2-3.9)                   | 1 (reference)    | 337           | 3.1 (2.8-3.5)                   | 1 (reference)    |  |
| Middle                                           | 147                             | 2.0 (1.7-2.3)    | 178           | 2.4 (2.0-2.8)                   | 0.46 (0.38-0.55) | 184           | 2.5 (2.1-2.9)                   | 0.80 (0.65-0.98) |  |
| High                                             | 54                              | 1.0 (0.7-1.3)    | 95            | 1.7 (1.3-2.3)                   | 0.23 (0.17-0.30) | 136           | 2.3 (1.5-3.7)                   | 0.58 (0.35-0.96) |  |
| 28.2 Study population II (education as exposure) |                                 |                  |               |                                 |                  |               |                                 |                  |  |
| Low                                              | 416                             | 3.8 (3.4-4.2)    | 362           | 3.2 (2.9-3.5)                   | 1 (reference)    | 334           | 3.0 (2.7-3.3)                   | 1 (reference)    |  |
| Middle                                           | 145                             | 1.8 (1.5-2.1)    | 170           | 2.2 (1.9-2.6)                   | 0.49 (0.40-0.59) | 179           | 2.3 (1.9-2.7)                   | 0.76 (0.62-0.92) |  |
| High                                             | 51                              | 1.4 (1.0-1.8)    | 66            | 1.8 (1.4-2.4)                   | 0.37 (0.28-0.49) | 74            | 2.0 (1.4-3.0)                   | 0.72 (0.48-1.06) |  |
| Cardiac readmission                              |                                 |                  |               |                                 |                  |               |                                 |                  |  |
| Unadjusted                                       |                                 |                  | Model I       |                                 |                  | Model II      |                                 |                  |  |
| No. of events                                    | Event rate pr. 100,000 pr. yrs. | HR               | No. of events | Event rate pr. 100,000 pr. yrs. | HR               | No. of events | Event rate pr. 100,000 pr. yrs. | HR               |  |
| Study population I (income as exposure)          |                                 |                  |               |                                 |                  |               |                                 |                  |  |
| Low                                              | 2,404                           | 34.5 (33.1-35.9) | 2,390         | 30.5 (29.0-32.1)                | 1 (reference)    | 2,278         | 28.2 (26.3-30.3)                | 1 (reference)    |  |
| Middle                                           | 1,433                           | 25.2 (23.9-26.5) | 1,500         | 26.4 (24.9-28.0)                | 0.75 (0.71-0.80) | 1,502         | 26.7 (25.1-28.4)                | 0.91 (0.85-0.97) |  |
| High                                             | 790                             | 17.4 (16.2-18.6) | 1,000         | 23.0 (20.9-25.4)                | 0.55 (0.52-0.60) | 1,342         | 28.1 (22.3-34.6)                | 0.89 (0.79-1.00) |  |
| Study population II (education as exposure)      |                                 |                  |               |                                 |                  |               |                                 |                  |  |
| Low                                              | 2,646                           | 32.9 (31.7-34.2) | 2,525         | 30.1 (28.7-31.5)                | 1 (reference)    | 2,436         | 28.8 (27.4-30.3)                | 1 (reference)    |  |
| Middle                                           | 1,409                           | 22.8 (21.6-24.0) | 1,488         | 24.8 (23.4-26.3)                | 0.76 (0.72-0.80) | 1,505         | 25.1 (23.6-26.7)                | 0.90 (0.85-0.95) |  |
| High                                             | 572                             | 19.2 (17.7-20.8) | 626           | 22.0 (20.1-24.2)                | 0.65 (0.60-0.71) | 691           | 24.5 (21.8-27.7)                | 0.91 (0.82-1.00) |  |

# Supplementary Figure S4. Cumulative incidence on the association between income and secondary outcomes adjusted for age and ethnicity.

## Study population I (income as exposure)

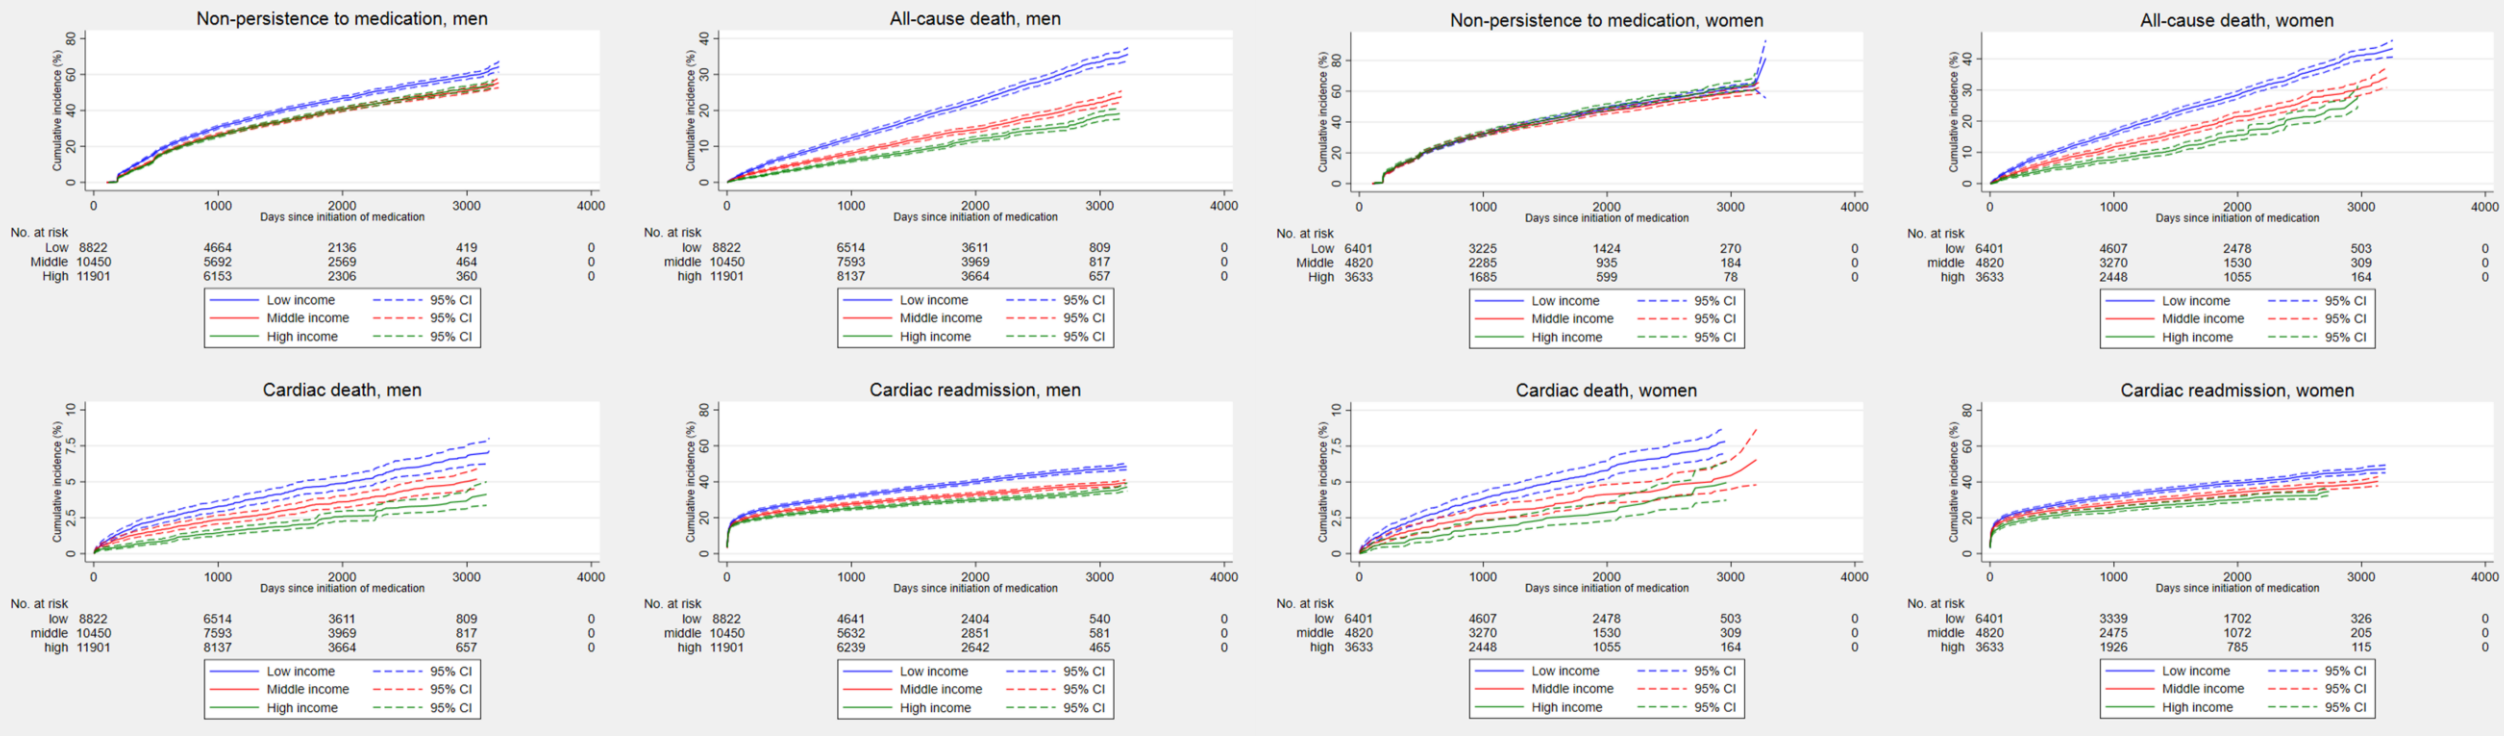

**Supplementary Figure S5.** Cumulative incidence on the association between education and secondary outcomes adjusted for age and ethnicity.

**Study population II (education as exposure)**

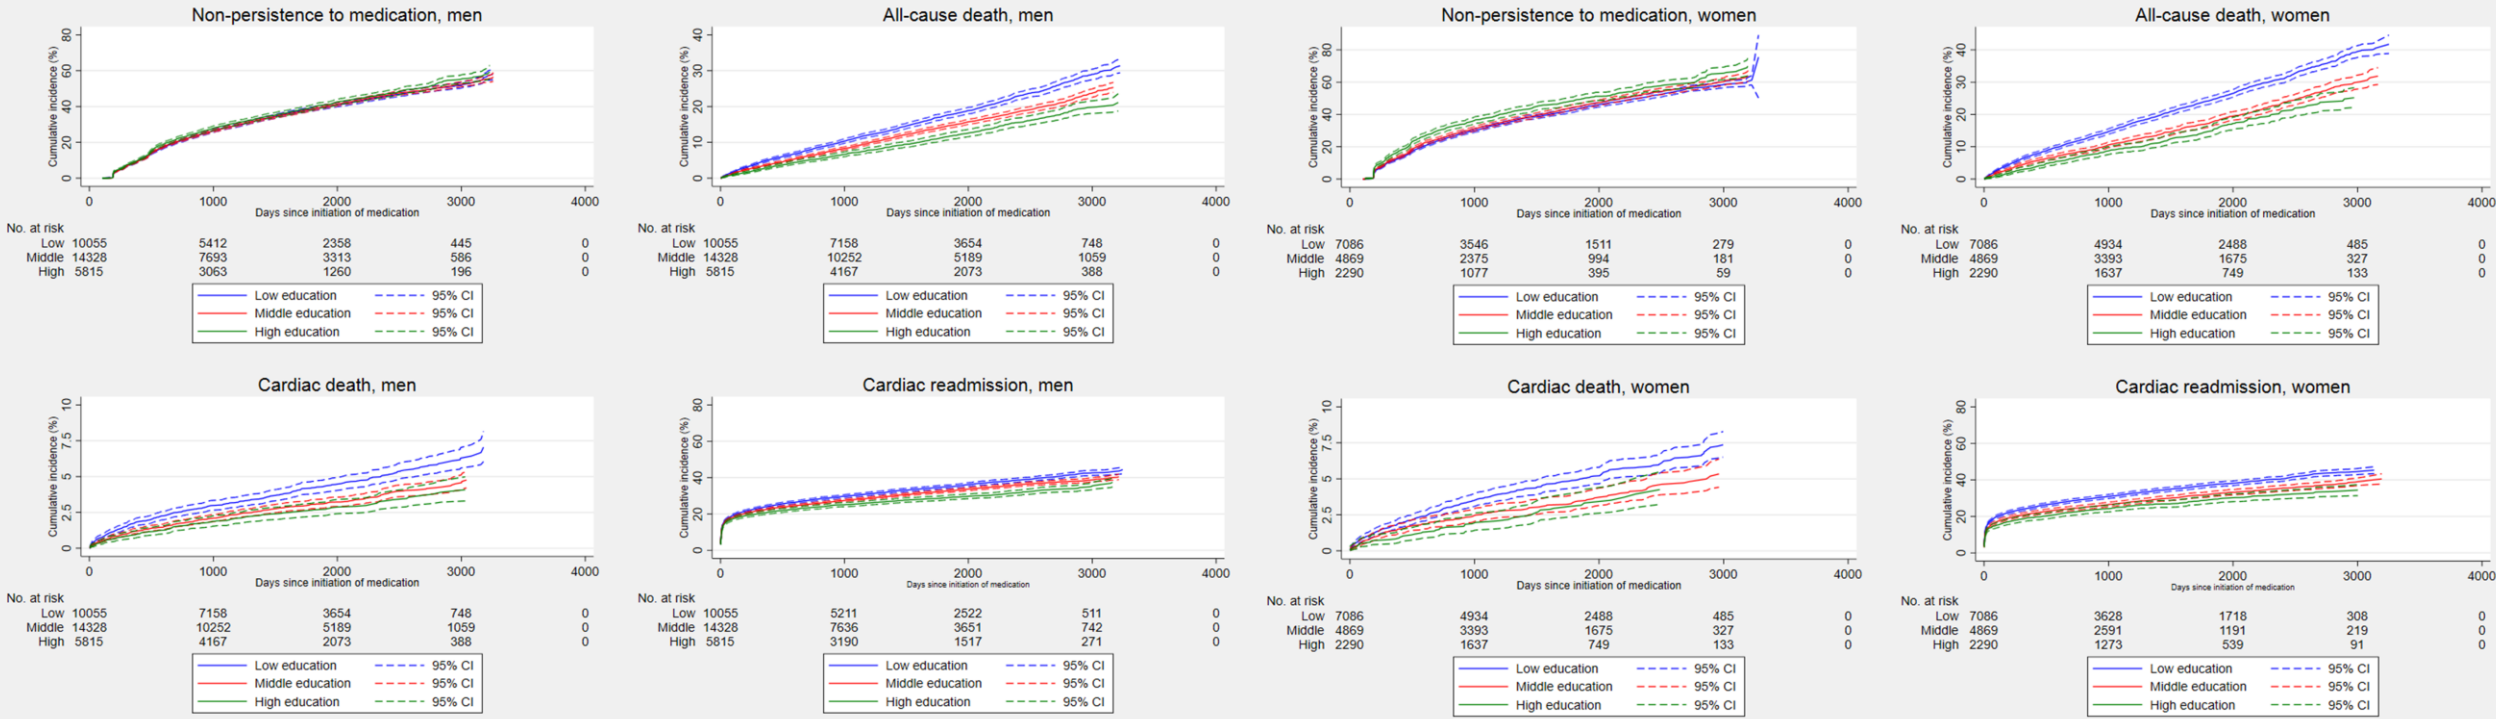

**Supplementary Figure S6.** Number of events, event rates, and hazard ratios (95% confidence intervals) on the association between income and non-persistence to **statins** as well as the mediating effect on the association between income and risk of MACE among **men**, adjusted for age and ethnicity

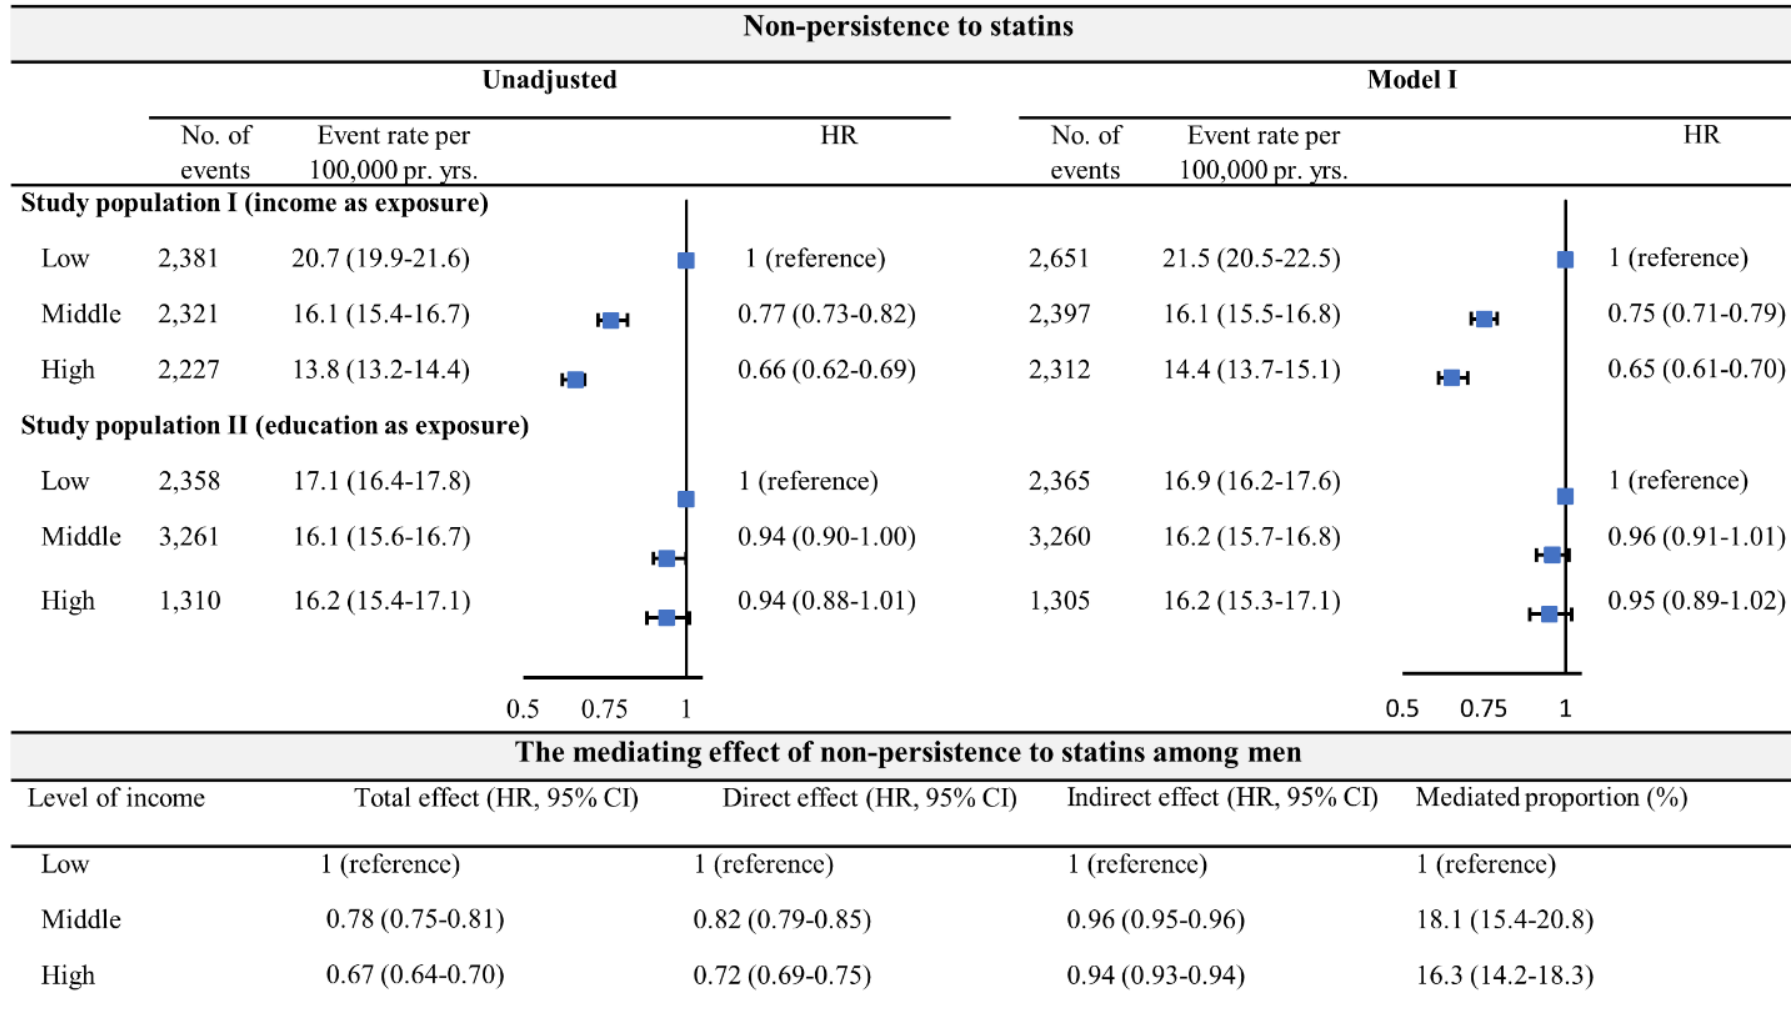

**The mediating effect of non-persistence to statins among men**

| Level of income | Total effect (HR, 95% CI) | Direct effect (HR, 95% CI) | Indirect effect (HR, 95% CI) | Mediated proportion (%) |
|-----------------|---------------------------|----------------------------|------------------------------|-------------------------|
| Low             | 1 (reference)             | 1 (reference)              | 1 (reference)                | 1 (reference)           |
| Middle          | 0.78 (0.75-0.81)          | 0.82 (0.79-0.85)           | 0.96 (0.95-0.96)             | 18.1 (15.4-20.8)        |
| High            | 0.67 (0.64-0.70)          | 0.72 (0.69-0.75)           | 0.94 (0.93-0.94)             | 16.3 (14.2-18.3)        |

**Supplementary Figure S7.** Number of events, event rates, and hazard ratios (95% confidence intervals) on the association between income and non-persistence to antiplatelets as well as the mediating effect on the association between income and risk of MACE among **men**, adjusted for age and ethnicity.

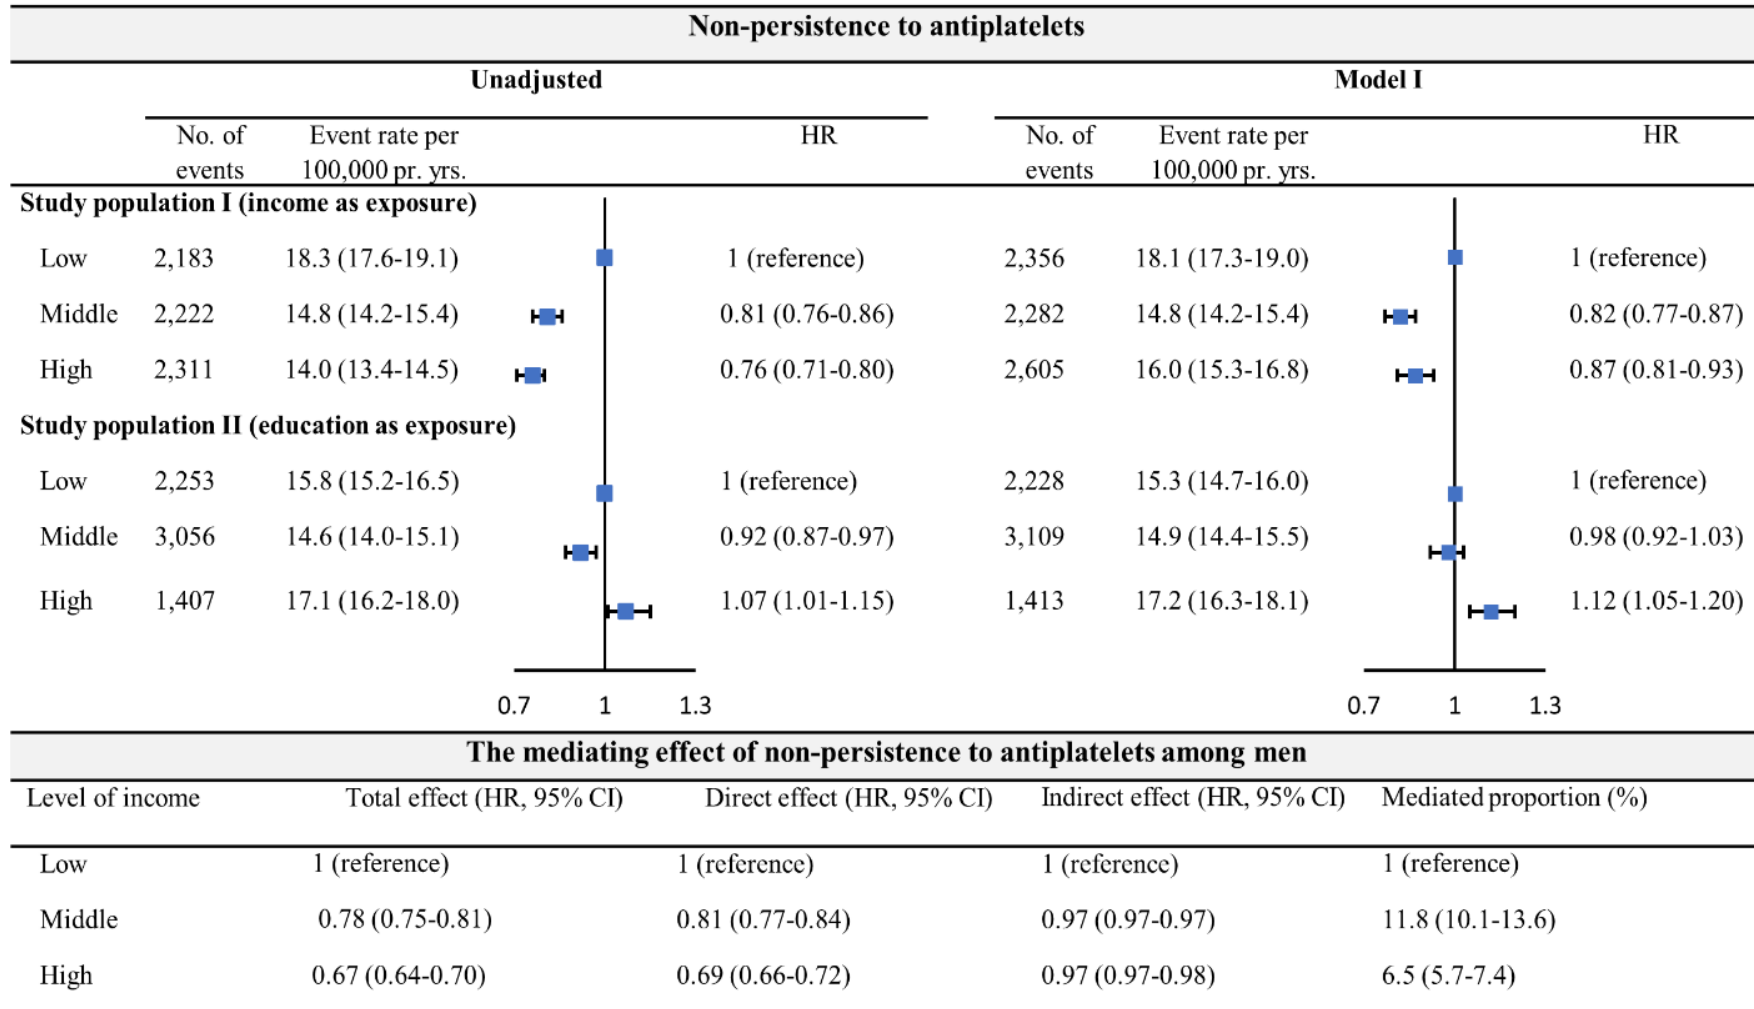

**The mediating effect of non-persistence to antiplatelets among men**

| Level of income | Total effect (HR, 95% CI) | Direct effect (HR, 95% CI) | Indirect effect (HR, 95% CI) | Mediated proportion (%) |
|-----------------|---------------------------|----------------------------|------------------------------|-------------------------|
| Low             | 1 (reference)             | 1 (reference)              | 1 (reference)                | 1 (reference)           |
| Middle          | 0.78 (0.75-0.81)          | 0.81 (0.77-0.84)           | 0.97 (0.97-0.97)             | 11.8 (10.1-13.6)        |
| High            | 0.67 (0.64-0.70)          | 0.69 (0.66-0.72)           | 0.97 (0.97-0.98)             | 6.5 (5.7-7.4)           |



**Supplementary Table S1.** ICD-10 codes, ATC-codes, and procedure codes used in present study

| <b>Main diagnosis</b>                   | <b>ICD-10 codes</b>                                                                            |                                                                                                                                                                                                                                                                                                                                                                                            |
|-----------------------------------------|------------------------------------------------------------------------------------------------|--------------------------------------------------------------------------------------------------------------------------------------------------------------------------------------------------------------------------------------------------------------------------------------------------------------------------------------------------------------------------------------------|
| Acute coronary syndrome                 | I200, I21, I24                                                                                 |                                                                                                                                                                                                                                                                                                                                                                                            |
| <b>Outcome/diagnosis</b>                | <b>ICD-10 codes</b>                                                                            |                                                                                                                                                                                                                                                                                                                                                                                            |
| Cardiac death                           | I20-I25                                                                                        |                                                                                                                                                                                                                                                                                                                                                                                            |
| Acute cardiac readmission:              |                                                                                                |                                                                                                                                                                                                                                                                                                                                                                                            |
| Acute myocardial infarction             | I21-I22                                                                                        |                                                                                                                                                                                                                                                                                                                                                                                            |
| Stroke                                  | I60-I64                                                                                        |                                                                                                                                                                                                                                                                                                                                                                                            |
| Cardiac arrest                          | I46                                                                                            |                                                                                                                                                                                                                                                                                                                                                                                            |
| Chronic heart failure                   | I11.0, I42.0, I42.6, I42.8, I50                                                                |                                                                                                                                                                                                                                                                                                                                                                                            |
| Ventricular tachycardia or fibrillation | I49.0                                                                                          |                                                                                                                                                                                                                                                                                                                                                                                            |
| <b>Mediator</b>                         | <b>ATC code</b>                                                                                |                                                                                                                                                                                                                                                                                                                                                                                            |
| Antiplatelets                           | B01AC04, B01AC06, B01AC22, B01AC24                                                             |                                                                                                                                                                                                                                                                                                                                                                                            |
| Statins                                 | C10AA                                                                                          |                                                                                                                                                                                                                                                                                                                                                                                            |
| <b>Procedures</b>                       | <b>Procedure code</b>                                                                          |                                                                                                                                                                                                                                                                                                                                                                                            |
| Percutaneous coronary intervention      | KFNG00, KFNG01, KFNG02, KFNG05, KFNG10, KFNG12, KFNG20, KFNG22, KFNG30, KFNG40, KFNG96, KZFX01 |                                                                                                                                                                                                                                                                                                                                                                                            |
| <b>Charlson Comorbidity Index</b>       | <b>Assigned weighting</b>                                                                      | <b>ICD-10 Code</b>                                                                                                                                                                                                                                                                                                                                                                         |
| AMI                                     | 1                                                                                              | I21, I22, I23, I410                                                                                                                                                                                                                                                                                                                                                                        |
| CHF                                     | 1                                                                                              | I50, I110, I130, I132                                                                                                                                                                                                                                                                                                                                                                      |
| Peripheral vascular disease             | 1                                                                                              | I70, I71, I72, I73, I74, I77                                                                                                                                                                                                                                                                                                                                                               |
| Cerebral vascular accident              | 1                                                                                              | G45, G46, I60, I61, I62, I63, I64, I65, I66, I67, I68, I69                                                                                                                                                                                                                                                                                                                                 |
| Dementia                                | 1                                                                                              | F00, F01, F02, F03, F051, G30                                                                                                                                                                                                                                                                                                                                                              |
| Pulmonary disease                       | 1                                                                                              | J40, J41, J42, J43, J44, J45, J46, J47, J60, J61, J62, J63, J64, J65, J66, J67, J684, J701, J703, J841, J920, J961, J982, J983                                                                                                                                                                                                                                                             |
| Connective tissue disorder              | 1                                                                                              | M05, M06, M08, M09, M30, M31, M32, M33, M34, M35, M36, D86                                                                                                                                                                                                                                                                                                                                 |
| Peptic ulcer                            | 1                                                                                              | K221, K25, K26, K27, K28,                                                                                                                                                                                                                                                                                                                                                                  |
| Mild liver disease                      | 1                                                                                              | B18, K700, K701, K702, K703, K709, K71, K13, K74, K760                                                                                                                                                                                                                                                                                                                                     |
| Diabetes without complications          | 1                                                                                              | E100, E101, E109, E110, E111, E119,                                                                                                                                                                                                                                                                                                                                                        |
| Diabetes with chronic complications     | 2                                                                                              | E102, E103, E104, E105, E107, E108, E112, E113, E114, E115, E117, E118                                                                                                                                                                                                                                                                                                                     |
| Hemiplegia                              | 2                                                                                              | G81, G82                                                                                                                                                                                                                                                                                                                                                                                   |
| Renal disease                           | 2                                                                                              | I12, I13, N00, N01, N02, N03, N04, N05, N07, N11, N14, N17, N18, N19, Q61                                                                                                                                                                                                                                                                                                                  |
| Any tumour                              | 2                                                                                              | C00, C01, C02, C03, C04, C05, C06, C07, C08, C09, C10, C11, C12, C13, C14, C15, C16, C17, C18, C19, C20, C21, C22, C23, C24, C25, C26, C27, C28, C29, C30, C31, C32, C33, C34, C35, C36, C37, C38, C39, C40, C41, C42, C43, C44, C45, C46, C47, C48, C49, C50, C51, C52, C53, C54, C55, C56, C57, C58, C59, C60, C61, C62, C63, C64, C65, C66, C67, C68, C69, C70, C71, C72, C73, C74, C75 |
| Leukaemia                               | 2                                                                                              | C91, C92, C93, C94, C95                                                                                                                                                                                                                                                                                                                                                                    |
| Lymphoma                                | 2                                                                                              | C81, C82, C83, C84, C85, C88, C90, C96                                                                                                                                                                                                                                                                                                                                                     |
| Moderate or severe liver disease        | 3                                                                                              | B150, B160, B162, B190, K704, K72, K766, I85,                                                                                                                                                                                                                                                                                                                                              |
| Metastatic solid tumour                 | 6                                                                                              | C76, C77, C78, C79, C80                                                                                                                                                                                                                                                                                                                                                                    |
| Aids/HIV                                | 6                                                                                              | B21, B22, B23, B24                                                                                                                                                                                                                                                                                                                                                                         |
| <b>Psychiatric comorbidity</b>          | <b>ICD-10 codes</b>                                                                            | <b>ATC-codes</b>                                                                                                                                                                                                                                                                                                                                                                           |
| Depression, Anxiety, OCD                | F32, F33<br>F40-F42                                                                            | N06A excluding N06AX12 and N06AX21<br>N05B and N05C excluding N05CH01                                                                                                                                                                                                                                                                                                                      |

**Supplementary Table S2.** Baseline characteristics of study population II (education as exposure) stratified by sex.

| Characteristics                                         | Men                 |                        |                     | Women              |                       |                     |
|---------------------------------------------------------|---------------------|------------------------|---------------------|--------------------|-----------------------|---------------------|
|                                                         | Low<br>(n = 10,050) | Middle<br>(n = 14,329) | High<br>(n = 5,817) | Low<br>(n = 7,079) | Middle<br>(n = 4,874) | High<br>(n = 2,292) |
| <b>Days of follow-up, median (25th-75th percentile)</b> | 1,020 (257-1,957)   | 1,130 (397-2,046)      | 1,167 (441-2,042)   | 977 (178-1,880)    | 1,150 (431-2,040)     | 1,222 (518-2,034)   |
| <b>Age (years), median + SD</b>                         | 65.3 (12.7)         | 62.9 (11.7)            | 63.6 (11.2)         | 71.4 (12.3)        | 65.7 (12.5)           | 64.6 (12.2)         |
| <b>Age group (years), n (%)</b>                         |                     |                        |                     |                    |                       |                     |
| < 65 years                                              | 4,526 (45.0)        | 7,817 (54.6)           | 2,992 (51.4)        | 1,894 (26.8)       | 2,148 (44.1)          | 1,138 (49.7)        |
| 65-74 years                                             | 2,854 (28.4)        | 4,101 (28.6)           | 1,825 (31.4)        | 1,933 (27.3)       | 1,436 (29.5)          | 622 (27.1)          |
| ≥ 75 years                                              | 2,670 (26.6)        | 2,411 (16.8)           | 1,000 (17.2)        | 3,252 (45.9)       | 1,290 (26.5)          | 532 (23.2)          |
| <b>Ethnicity, n (%)</b>                                 |                     |                        |                     |                    |                       |                     |
| Immigrants/Descendants                                  | 777 (7.7)           | 990 (6.9)              | 610 (10.5)          | 312 (4.4)          | 264 (5.4)             | 163 (7.1)           |
| <b>Income level, n (%)</b>                              |                     |                        |                     |                    |                       |                     |
| Low                                                     | 4,190               | 3,539                  | 660                 | 4,163 (58.8)       | 1,551 (31.8)          | 318 (13.9)          |
| Middle                                                  | 3,684               | 5,201                  | 1,301               | 2,074 (29.3)       | >1,873 (>38.3)        | >745 (>32.5)        |
| High                                                    | 2,155               | 5,551                  | 3,844               | 833 (11.8)         | 1,442 (29.6)          | 1,225 (53.4)        |
| Missing                                                 | 21                  | 38                     | 12                  | 9 (0.1)            | < 8 (<0.1)            | <5(<0.2)            |
| <b>Civil status, n (%)</b>                              |                     |                        |                     |                    |                       |                     |
| Single living                                           | 3,227 (32.1)        | 3,506 (24.5)           | 1,132 (19.5)        | 3,764 (53.2)       | 1,984 (40.7)          | 894 (39.0)          |
| <b>Somatic comorbidity (CCI), n (%)</b>                 |                     |                        |                     |                    |                       |                     |
| None (0 points)                                         | 586 (5.8)           | 972 (6.8)              | 469 (8.1)           | 453 (6.4)          | 413 (8.5)             | 237 (10.3)          |
| Moderate (1-2 points)                                   | 7,667 (76.3)        | 11,262 (78.6)          | 4,663 (80.2)        | 4,939 (69.8)       | 3,625 (74.4)          | 1,716 (74.9)        |
| High (>2 points)                                        | 1,797 (17.9)        | 2,095 (14.6)           | 685 (11.8)          | 1,687 (23.8)       | 836 (17.2)            | 339 (14.8)          |
| <b>Psychiatric comorbidity, n (%)</b>                   |                     |                        |                     |                    |                       |                     |
| Current (<90 days)                                      | 1,199 (11.9)        | 1,309 (9.1)            | 527 (9.1)           | 1,823 (25.8)       | 1,004 (20.6)          | 393 (17.1)          |
| Recent (90-365 days)                                    | 499 (5.0)           | 686 (4.8)              | 333 (5.7)           | 632 (8.9)          | 442 (9.1)             | 168 (7.3)           |
| Past (>365 days)                                        | 1,850 (18.4)        | 2,538 (17.7)           | 983 (16.9)          | 1,643 (23.2)       | 1,156 (23.7)          | 536 (23.4)          |
| None                                                    | 6,502 (64.7)        | 9,796 (68.4)           | 3,974 (68.3)        | 2,981 (42.1)       | 2,272 (46.6)          | 1,195 (52.1)        |
| <b>Prior treatment, n (%)</b>                           |                     |                        |                     |                    |                       |                     |
| Antiplatelets                                           | 3,465 (34.5)        | 4,782 (33.4)           | 1,848 (31.8)        | 3,193 (45.1)       | 1,811 (37.2)          | 789 (34.4)          |
| Statins                                                 | 3,236 (32.2)        | 4,088 (28.5)           | 1,572 (27.0)        | 2,854 (40.3)       | 1,560 (32.0)          | 692 (30.2)          |
| <b>Percutaneous coronary intervention, n (%)</b>        | 4,515 (44.9)        | 6,745 (47.1)           | 2,768 (47.6)        | 2,236 (31.6)       | 1,735 (35.6)          | 884 (38.6)          |

**Supplementary Table S3:** Events, event rates (95% CI), and hazard ratios (95% CI) for the association between **income** and risk of non-persistence to medication and clinical events using none or 30-days window of initiation of medication

|                                           | No criteria         |                        |                      | 30 days             |                        |                      |
|-------------------------------------------|---------------------|------------------------|----------------------|---------------------|------------------------|----------------------|
|                                           | Low<br>(n = 20,167) | Middle<br>(n = 20,167) | High<br>(n = 20,167) | Low<br>(n = 12,652) | Middle<br>(n = 12,651) | High<br>(n = 12,651) |
| <b>Major adverse cardiovascular event</b> |                     |                        |                      |                     |                        |                      |
| Unadjusted                                |                     |                        |                      |                     |                        |                      |
| Events                                    | 10,952              | 8,412                  | 5,858                | 6,010               | 4,371                  | 3,332                |
| Event rate per 100,000 person-years       | 55.4 (54.4-56.5)    | 37.6 (36.8-38.4)       | 23.4 (22.8-24.0)     | 42.0 (41.0-43.1)    | 27.6 (26.8-28.4)       | 20.8 (20.1-21.5)     |
| Total effect, HR                          | 1 (reference)       | 0.71 (0.70-0.73)       | 0.47 (0.46-0.48)     | 1 (reference)       | 0.68 (0.66-0.71)       | 0.52 (0.50-0.54)     |
| Model 1                                   |                     |                        |                      |                     |                        |                      |
| Events                                    | 10,873              | 8,856                  | 7,308                | 5,822               | 4,570                  | 3,898                |
| Event rate per 100,000 person-years       | 46.4 (45.1-47.6)    | 38.4 (37.4-39.4)       | 30.9 (29.8-32.0)     | 36.1 (34.9-27.3)    | 28.4 (27.4-29.3)       | 25.0 (23.8-26.2)     |
| Total effect, HR                          | 1 (reference)       | 0.82 (0.80-0.85)       | 0.66 (0.64-0.68)     | 1 (reference)       | 0.79 (0.76-0.82)       | 0.68 (0.65-0.71)     |
| Model 2                                   |                     |                        |                      |                     |                        |                      |
| Events                                    | 9,935               | 8,768                  | 9,700                | 5,298               | 4,578                  | 5,215                |
| Event rate per 100,000 person-years       | 41.1 (39.7-42.6)    | 37.8 (36.8-38.8)       | 40.4 (37.4-43.7)     | 32.4 (31.0-33.9)    | 28.4 (27.4-29.4)       | 31.8 (28.2-36.1)     |
| Total effect, HR                          | 1 (reference)       | 0.89 (0.87-0.92)       | 0.81 (0.78-0.85)     | 1 (reference)       | 0.86 (0.83-0.90)       | 0.81 (0.76-0.84)     |
| <b>Non-persistence to medication</b>      |                     |                        |                      |                     |                        |                      |
| Unadjusted                                |                     |                        |                      |                     |                        |                      |
| Events                                    | 6,627               | 6,338                  | 6,213                | 4,985               | 4,423                  | 4,053                |
| Event rate per 100,000 person-years       | 32.2 (31.5-33.0)    | 27.7 (27.0-28.4)       | 25.3 (24.6-25.9)     | 34.0 (33.1-35.0)    | 27.7 (26.8-28.5)       | 25.6 (24.8-26.4)     |
| Total effect, HR                          | 1 (reference)       | 0.86 (0.83-0.89)       | 0.78 (0.76-0.81)     | 1 (reference)       | 0.81 (0.78-0.85)       | 0.74 (0.71-0.77)     |
| Model 1                                   |                     |                        |                      |                     |                        |                      |
| Events                                    | 7,371               | 6,545                  | 6,745                | 5,272               | 4,587                  | 4,460                |
| Event rate per 100,000 person-years       | 30.8 (30.0-31.7)    | 27.7 (27.1-28.4)       | 29.0 (28.1-29.9)     | 32.6 (31.6-33.7)    | 28.2 (27.4-29.0)       | 29.0 (27.9-30.2)     |
| Total effect, HR                          | 1 (reference)       | 0.90 (0.86-0.93)       | 0.91 (0.88-0.95)     | 1 (reference)       | 0.87 (0.81-0.90)       | 0.87 (0.83-0.91)     |
| Model 2                                   |                     |                        |                      |                     |                        |                      |
| Events                                    | 7,319               | 6,526                  | 7,063                | 5,179               | 4,603                  | 4,935                |
| Event rate per 100,000 person-years       | 30.5 (29.3-31.7)    | 27.7 (27.0-28.4)       | 29.3 (27.7-31.1)     | 32.3 (31.0-33.7)    | 28.4 (27.5-29.3)       | 30.1 (28.2-32.1)     |
| Total effect, HR                          | 1 (reference)       | 0.91 (0.87-0.95)       | 0.91 (0.86-0.96)     | 1 (reference)       | 0.88 (0.84-0.93)       | 0.88 (0.82-0.94)     |
| <b>All-cause death</b>                    |                     |                        |                      |                     |                        |                      |
| Unadjusted                                |                     |                        |                      |                     |                        |                      |
| Events                                    | 7,452               | 4,458                  | 2,097                | 3,296               | 1,569                  | 801                  |
| Event rate per 100,000 person-years       | 27.5 (26.8-28.1)    | 15.3 (14.8-15.7)       | 6.8 (6.5-7.1)        | 16.7 (16.2-17.3)    | 7.6 (7.3-8.0)          | 4.0 (3.7-4.3)        |
| Total effect, HR                          | 1 (reference)       | 0.56 (0.54-0.57)       | 0.25 (0.24-0.26)     | 1 (reference)       | 0.46 (0.43-0.48)       | 0.24 (0.22-0.25)     |
| Model 1                                   |                     |                        |                      |                     |                        |                      |
| Events                                    | 6,774               | 4,817                  | 3,473                | 2,828               | 1,724                  | 1,272                |
| Event rate per 100,000 person-years       | 21.4 (20.8-22.0)    | 16.0 (15.5-16.5)       | 11.6 (11.0-12.3)     | 12.9 (12.5-13.5)    | 8.2 (7.8-8.6)          | 6.4 (5.9-7.0)        |
| Total effect, HR                          | 1 (reference)       | 0.75 (0.72-0.78)       | 0.52 (0.50-0.55)     | 1 (reference)       | 0.66 (0.62-0.70)       | 0.50 (0.45-0.54)     |
| Model 2                                   |                     |                        |                      |                     |                        |                      |
| Events                                    | 6,006               | 4,800                  | 5,520                | 2,440               | 1,776                  | 2,116                |
| Event rate per 100,000 person-years       | 18.8 (18.2-19.4)    | 15.9 (15.4-16.4)       | 18.0 (15.9-20.5)     | 11.2 (10.7-11.7)    | 8.5 (8.1-8.9)          | 10.1 (7.7-13.4)      |
| Total effect, HR                          | 1 (reference)       | 0.85 (0.81-0.88)       | 0.72 (0.67-0.78)     | 1 (reference)       | 0.78 (0.72-0.83)       | 0.67 (0.58-0.77)     |
| <b>Cardiac death</b>                      |                     |                        |                      |                     |                        |                      |
| Unadjusted                                |                     |                        |                      |                     |                        |                      |
| Events                                    | 1,766               | 1,109                  | 501                  | 705                 | 375                    | 164                  |
| Event rate per 100,000 person-years       | 6.5 (6.2-6.8)       | 3.8 (3.6-4.0)          | 1.6 (1.5-1.8)        | 3.6 (3.3-3.8)       | 1.8 (1.6-2.0)          | 0.8 (0.7-1.0)        |
| Total effect, HR                          | 1 (reference)       | 0.58 (0.54-0.62)       | 0.25 (0.23-0.28)     | 1 (reference)       | 0.51 (0.45-0.57)       | 0.22 (0.19-0.26)     |
| Model 1                                   |                     |                        |                      |                     |                        |                      |

|                                     |                  |                   |                  |                  |                  |                  |
|-------------------------------------|------------------|-------------------|------------------|------------------|------------------|------------------|
| Events                              | 1,608            | 1,217             | 810              | 600              | 410              | 253              |
| Event rate per 100,000 person-years | 5.1 (4.8-5.3)    | 4.0 (3.8-4.3)     | 2.7 (2.4-3.0)    | 2.7 (2.5-3.0)    | 2.0 (1.8-2.2)    | 1.3 (1.1-1.5)    |
| Total effect, HR                    | 1 (reference)    | 0.79 (0.73-0.85)  | 0.51 (0.46-0.57) | 1 (reference)    | 0.72 (0.64-0.82) | 0.46 (0.37-0.55) |
| <b>Model 2</b>                      |                  |                   |                  |                  |                  |                  |
| Events                              | 1,410            | 1,240             | 1,266            | 521              | 422              | 376              |
| Event rate per 100,000 person-years | 4.4 (4.2-4.7)    | 4.1 (3.9-4.4)     | 4.1 (3.3-5.2)    | 2.4 (2.2-2.6)    | 2.0 (1.8-2.2)    | 1.8 (1.3-2.4)    |
| Total effect, HR                    | 1 (reference)    | 0.93 (0.85-1.01)  | 0.71 (0.60-0.84) | 1 (reference)    | 0.87 (0.75-1.00) | 0.58 (0.43-0.79) |
| <b>Cardiac readmission</b>          |                  |                   |                  |                  |                  |                  |
| <b>Unadjusted</b>                   |                  |                   |                  |                  |                  |                  |
| Events                              | 7,099            | 6,031             | 4,721            | 4,537            | 3,619            | 2,933            |
| Event rate per 100,000 person-years | 35.9 (35.1-36.8) | 26.9 (26.3-27.6)  | 18.9 (18.4-19.4) | 31.7 (30.8-32.7) | 22.9 (22.1-23.6) | 18.3 (17.7-19.0) |
| Total effect, HR                    | 1 (reference)    | 0.81 (0.78-0.83)  | 0.61 (0.59-0.63) | 1 (reference)    | 0.76 (0.73-0.79) | 0.62 (0.59-0.64) |
| <b>Model 1</b>                      |                  |                   |                  |                  |                  |                  |
| Events                              | 7,336            | 6,239             | 5,477            | 4,532            | 3,738            | 3,322            |
| Event rate per 100,000 person-years | 31.3 (30.3-23.3) | 27.0 (26.3-27.8)  | 23.1 (22.2-24.1) | 28.1 (27.0-29.2) | 23.2 (22.4-24.1) | 21.3 (20.2-22.4) |
| Total effect, HR                    | 1 (reference)    | 0.86 (0.84 (0.89) | 0.74 (0.72-0.77) | 1 (reference)    | 0.83 (0.80-0.86) | 0.74 (0.71-0.78) |
| <b>Model 2</b>                      |                  |                   |                  |                  |                  |                  |
| Events                              | 6,804            | 6,157             | 6,800            | 4,180            | 3,724            | 4,272            |
| Event rate per 100,000 person-years | 28.2 (27.0-29.3) | 26.5 (25.8-27.4)  | 28.4 (26.0-31.0) | 25.6 (24.4-26.9) | 23.1 (22.2-24.0) | 26.1 (23.2-29.4) |
| Total effect, HR                    | 1 (reference)    | 0.91 (0.88-0.94)  | 0.86 (0.82-0.92) | 1 (reference)    | 0.89 (0.85-0.93) | 0.87 (0.80-0.94) |

Model 1: Weighted by/ adjusted for age group, sex, ethnicity.

Model 2: Weighted by/ adjusted for age group, sex, ethnicity, civil status, somatic and psychiatric comorbidity.

**Supplementary Table S4.** Events, event rates (95% CI), and hazard ratios (95% CI) for the association between **education** and risk of non-persistence to medication and clinical events using none or 30-days window of initiation of medication

|                                           | No criteria         |                        |                      | 30 days             |                        |                     |
|-------------------------------------------|---------------------|------------------------|----------------------|---------------------|------------------------|---------------------|
|                                           | Low<br>(n = 23,451) | Middle<br>(n = 24,201) | High<br>(n = 10,389) | Low<br>(n = 13,962) | Middle<br>(n = 16,085) | High<br>(n = 6,891) |
| <b>Major adverse cardiovascular event</b> |                     |                        |                      |                     |                        |                     |
| Unadjusted                                |                     |                        |                      |                     |                        |                     |
| Events                                    | 12,102              | 9,559                  | 3,561                | 6,109               | 5,501                  | 2,103               |
| Event rate per 100,000 person-years       | 48.7 (47.8-49.6)    | 32.7 (32.0-33.3)       | 27.3 (26.4-28.2)     | 37.0 (36.1-37.9)    | 26.6 (25.9-27.4)       | 23.4 (22.5-24.5)    |
| Total effect                              | 1 (reference)       | 0.73 (0.72-0.75)       | 0.63 (0.61-0.65)     | 1 (reference)       | 0.76 (0.73-0.78)       | 0.67 (0.64-0.70)    |
| Model 1                                   |                     |                        |                      |                     |                        |                     |
| Events                                    | 11,210              | 10,078                 | 3,796                | 5,702               | 5,748                  | 2,185               |
| Event rate per 100,000 person-years       | 42.4 (41.4-43.4)    | 35.4 (34.6-36.3)       | 30.1 (29.0-31.2)     | 33.2 (32.2-34.2)    | 28.3 (27.4-29.1)       | 24.7 (23.6-25.9)    |
| Total effect                              | 1 (reference)       | 0.86 (0.84-0.88)       | 0.75 (0.72-0.77)     | 1 (reference)       | 0.87 (0.84-0.90)       | 0.77 (0.74-0.81)    |
| Model 2                                   |                     |                        |                      |                     |                        |                     |
| Events                                    | 10,571              | 10,215                 | 4,161                | 5,392               | 5,808                  | 2,381               |
| Event rate per 100,000 person-years       | 39.8 (38.8-40.8)    | 36.0 (35.2-36.9)       | 31.8 (30.3-33.4)     | 31.5 (30.4-32.5)    | 28.7 (27.8-29.5)       | 25.7 (24.2-27.3)    |
| Total effect                              | 1 (reference)       | 0.92 (0.90-0.94)       | 0.88 (0.85-0.92)     | 1 (reference)       | 0.92 (0.89-0.95)       | 0.88 (0.84-0.93)    |
| <b>Non-persistence to medication</b>      |                     |                        |                      |                     |                        |                     |
| Unadjusted                                |                     |                        |                      |                     |                        |                     |
| Events                                    | 7,599               | 7,942                  | 3,637                | 5,143               | 5,704                  | 2,614               |
| Event rate per 100,000 person-years       | 29.2 (28.5-29.9)    | 26.9 (26.3-27.4)       | 29.2 (28.3-30.2)     | 30.0 (29.1-30.8)    | 27.5 (26.8-28.2)       | 30.4 (29.2-31.6)    |
| Total effect                              | 1 (reference)       | 0.93 (0.90-0.96)       | 1.00 (0.96-1.04)     | 1 (reference)       | 0.92 (0.89-0.96)       | 1.01 (0.96-1.06)    |
| Model 1                                   |                     |                        |                      |                     |                        |                     |
| Events                                    | 7,584               | 8,008                  | 3,659                | 4,999               | 5,831                  | 2,654               |
| Event rate per 100,000 person-years       | 27.5 (26.8-28.1)    | 27.8 (27.2-28.5)       | 30.3 (29.3-31.3)     | 28.1 (27.3-28.9)    | 28.6 (27.8-29.4)       | 31.4 (30.2-32.7)    |
| Total effect, HR                          | 1 (reference)       | 1.00 (0.98-1.04)       | 1.09 (1.05-1.14)     | 1 (reference)       | 1.01 (0.97-1.05)       | 1.11 (1.06-1.17)    |
| Model 2                                   |                     |                        |                      |                     |                        |                     |
| Events                                    | 7,486               | 8,036                  | 3,821                | 4,871               | 5,855                  | 2,823               |
| Event rate per 100,000 person-years       | 27.1 (26.4-27.9)    | 28.0 (27.4-28.7)       | 30.4 (29.1-31.7)     | 27.5 (26.6-28.4)    | 28.8 (28.0-29.6)       | 31.9 (30.4-33.6)    |
| Total effect, HR                          | 1 (reference)       | 1.03 (0.99-1.06)       | 1.14 (1.09-1.20)     | 1 (reference)       | 1.04 (1.00-1.08)       | 1.18 (1.12-1.25)    |
| <b>All-cause death</b>                    |                     |                        |                      |                     |                        |                     |
| Unadjusted                                |                     |                        |                      |                     |                        |                     |
| Events                                    | 7,60                | 4,711                  | 1,636                | 3,051               | 1,934                  | 681                 |
| Event rate per 100,000 person-years       | 23.0 (22.5-23.5)    | 12.5 (12.1-12.9)       | 10.0 (9.6-10.5)      | 13.7 (13.2-14.2)    | 7.2 (6.9-7.6)          | 6.0 (5.6-6.5)       |
| Total effect                              | 1 (reference)       | 0.56 (0.54-0.58)       | 0.45 (0.43-0.47)     | 1 (reference)       | 0.53 (0.50-0.56)       | 0.44 (0.40-0.48)    |
| Model 1                                   |                     |                        |                      |                     |                        |                     |
| Events                                    | 6,526               | 5,318                  | 1,881                | 2,560               | 2,184                  | 766                 |
| Event rate per 100,000 person-years       | 18.6 (18.1-19.0)    | 14.4 (14.0-14.9)       | 11.8 (11.3-12.4)     | 11.2 (10.8-11.6)    | 8.3 (7.9-8.7)          | 6.8 (6.3-7.3)       |
| Total effect                              | 1 (reference)       | 0.78 (0.75-0.81)       | 0.64 (0.61-0.68)     | 1 (reference)       | 0.74 (0.70-0.78)       | 0.62 (0.57-0.68)    |
| Model 2                                   |                     |                        |                      |                     |                        |                     |
| Events                                    | 5,925               | 5,479                  | 2,110                | 2,301               | 2,252                  | 847                 |
| Event rate per 100,000 person-years       | 17.0 (16.5-17.4)    | 14.9 (14.5-15.4)       | 12.6 (11.8-13.4)     | 10.2 (9.8-10.6)     | 8.5 (8.2-8.9)          | 7.1 (6.4-7.8)       |
| Total effect                              | 1 (reference)       | 0.86 (0.83-0.89)       | 0.82 (0.77-0.88)     | 1 (reference)       | 0.81 (0.76-0.86)       | 0.74 (0.67-0.83)    |
| <b>Cardiac death</b>                      |                     |                        |                      |                     |                        |                     |
| Unadjusted                                |                     |                        |                      |                     |                        |                     |
| Events                                    | 1,900               | 1,094                  | 382                  | 684                 | 406                    | 154                 |
| Event rate per 100,000 person-years       | 5.7 (5.4-6.0)       | 2.9 (2.7-3.1)          | 2.3 (2.1-2.6)        | 3.1 (2.9-3.3)       | 1.5 (1.4-1.7)          | 1.4 (1.2-1.6)       |

|                                     |               |                  |                  |               |                  |                  |
|-------------------------------------|---------------|------------------|------------------|---------------|------------------|------------------|
| Total effect                        | 1 (reference) | 0.54 (0.50-0.58) | 0.44 (0.39-0.49) | 1 (reference) | 0.50 (0.44-0.56) | 0.45 (0.38-0.53) |
| <b>Model 1</b>                      |               |                  |                  |               |                  |                  |
| Events                              | 1,625         | 1,235            | 432              | 580           | 453              | 169              |
| Event rate per 100,000 person-years | 4.6 (4.4-4.9) | 3.4 (3.2-3.6)    | 2.7 (2.5-3.0)    | 2.5 (2.3-2.7) | 1.7 (1.6-1.9)    | 1.5 (1.3-1.8)    |
| Total effect                        | 1 (reference) | 0.73 (0.68-0.79) | 0.60 (0.54-0.67) | 1 (reference) | 0.67 (0.59-0.76) | 0.60 (0.50-0.71) |
| <b>Model 2</b>                      |               |                  |                  |               |                  |                  |
| Events                              | 1,491         | 1,271            | 471              | 518           | 467              | 185              |
| Event rate per 100,000 person-years | 4.3 (4.1-4.5) | 3.5 (3.2-3.7)    | 2.8 (2.5-3.2)    | 2.3 (2.1-2.5) | 1.8 (1.6-2.0)    | 1.5 (1.3-1.9)    |
| Total effect                        | 1 (reference) | 0.80 (0.74-0.87) | 0.74 (0.65-0.85) | 1 (reference) | 0.75 (0.66-0.86) | 0.73 (0.58-0.91) |

---

**Cardiac readmission**

|                                     |                  |                  |                  |                  |                  |                  |
|-------------------------------------|------------------|------------------|------------------|------------------|------------------|------------------|
| <b>Unadjusted</b>                   |                  |                  |                  |                  |                  |                  |
| Events                              | 8,077            | 7,085            | 2,689            | 4,745            | 4,574            | 1,770            |
| Event rate per 100,000 person-years | 32.5 (31.8-33.2) | 24.2 (23.7-24.8) | 20.6 (19.9-21.4) | 28.7 (27.9-29.5) | 22.2 (21.5-22.8) | 19.7 (18.8-20.7) |
| Total effect                        | 1 (reference)    | 0.83 (0.80-0.85) | 0.73 (0.70-0.76) | 1 (reference)    | 0.82 (0.80-0.85) | 0.74 (0.71-0.78) |
| <b>Model 1</b>                      |                  |                  |                  |                  |                  |                  |
| Events                              | 7,807            | 7,282            | 2,794            | 4,551            | 4,713            | 1,811            |
| Event rate per 100,000 person-years | 29.5 (28.7-30.3) | 25.6 (24.9-26.3) | 22.1 (21.2-23.1) | 26.5 (25.6-27.4) | 23.2 (22.4-24.0) | 20.5 (19.5-21.6) |
| Total effect                        | 1 (reference)    | 0.94 (0.92-0.97) | 0.90 (0.86-0.94) | 1 (reference)    | 0.94 (0.91-0.97) | 0.90 (0.86-0.95) |
| <b>Model 2</b>                      |                  |                  |                  |                  |                  |                  |
| Events                              | 7,471            | 7,344            | 3,071            | 4,363            | 4,749            | 1,986            |
| Event rate per 100,000 person-years | 28.1 (27.3-29.0) | 25.9 (25.2-26.6) | 23.5 (22.2-24.8) | 25.4 (24.5-26.4) | 23.4 (22.7-24.2) | 21.4 (20.1-22.9) |
| Total effect                        | 1 (reference)    | 0.94 (0.92-0.97) | 0.92 (0.88-0.97) | 1 (reference)    | 0.94 (0.90-0.97) | 0.91 (0.86-0.97) |

---

Model 1: Weighted by/ adjusted for age group, sex, ethnicity.

Model 2: Weighted by/ adjusted for age group, sex, ethnicity, civil status, somatic and psychiatric comorbidity.
